# Supplementary material for: Mania Associated With Herbal Medicines, Other Than Cannabis: A Systematic Review and Quality Assessment of Case Reports
Source: PubMed Central journal article supplement (PMC6043668; doi:10.3389/fpsyt.2018.00280), 2018-07-06
Supplement: Table_1.pdf [file Table_1.pdf]

Table 1. Details of each case report

| Author (date)                | Gender (age years) | Names of preparation                     | Dose of preparation         | Reason for taking HM          | Time to onset of manic symptoms | Concurrent medications                                         | Mental State at presentation                                                                                                                             | Diagnosis                             | Hospitalized | Psychiatric history                                           | Family psychiatric history              | Medical history                                                 | Treatment outcomes                                                                                                                                                              |
|------------------------------|--------------------|------------------------------------------|-----------------------------|-------------------------------|---------------------------------|----------------------------------------------------------------|----------------------------------------------------------------------------------------------------------------------------------------------------------|---------------------------------------|--------------|---------------------------------------------------------------|-----------------------------------------|-----------------------------------------------------------------|---------------------------------------------------------------------------------------------------------------------------------------------------------------------------------|
| Barbenel et al. (2000)       | M (28)             | St John's wort                           | Unknown                     | Depression                    | 5-8 weeks                       | Sertaline 50mg daily                                           | over-aroused, distractible, flight of ideas, grandiose delusions                                                                                         | Manic episode                         | Yes          | Referred for assessment of symptoms of depression             | Depression in 5 brothers                | Concomitant testosterone since bilateral orchidectomy.          | Unknown                                                                                                                                                                         |
| Dalwood et al. (2015)        | M (39)             | St John's Wort                           | "twice recommended dosage"  | Low mood                      | 4 weeks                         | None                                                           | Manic symptoms not elaborated                                                                                                                            | Manic episode                         | Yes          | None                                                          | None                                    | Unknown                                                         | Mania resolved after cessation of St John's wort and commencement of mood stabilizer medications                                                                                |
| Fahmi et al. (2002)          | F (28)             | Hypericum                                | Average 18g/day             | Depressive symptoms           | 2 weeks                         | None                                                           | Hyperactive, disorganized, pressured speech. Mood elevated, irritable. Flight of ideas, paranoid delusions.                                              | Acute mania                           | Yes          | 18-month history of depression                                | None                                    | None                                                            | Olanzapine and sodium valproate (doses unknown). Manic symptoms gradually resolved over three to four weeks                                                                     |
| Moses & Mallinger (2000)     | F (70)             | St John's wort                           | 3 x 300 then 2 x 300 mg/day | Depression                    | 2 weeks                         | Nortriptyline 75mg, bupropion 75mg daily                       | Insomnia, early waking, reckless spending, increased activity, careless                                                                                  | Not listed                            | Unclear      | 8 year history of recurrent depression                        | None                                    | Ménière's disease, left internal capsule infarct                | After two weeks she reported sleeping 8hrs per night, good spirits, less careless, not over-spending. Decreased St John's wort to one tablet, added valproic acid 750mg per day |
| Moses & Mallinger (2000)     | M (53)             | St John's wort                           | 900 mg/day                  | Depression                    | Shortly after                   | Unknown                                                        | increased self-esteem, racing thoughts, talkative, sleep decreased, libido increased, reckless spending, driving faster, visual hallucinations.          | Current diagnosis not listed          | Unclear      | Behaviors consistent with bipolar type II                     | Son bipolar type I, daughter depression | None                                                            | Discontinued St John's wort initiated lithium 900mg per day                                                                                                                     |
| Moses & Mallinger (2000)     | F (61)             | St John's wort                           | Unknown                     | Improve energy                | 2 weeks                         | Olanzapine 20mg daily, lithium                                 | Flamboyantly dressed, referential delusions, paranoia, erotomanic                                                                                        | Psychotic Mania                       | Yes          | Bipolar type I disorder                                       | Unknown                                 | hysterectomy, benign pulmonary nodules, thyromegaly             | Re-admission after 3 days for suspected medication-related delirium                                                                                                             |
| Nerenberg, Burt et al (1999) | M (20)             | St John's wort                           | 0.2 % hypericum, 300 mg tds | Major depression              | 3 days                          | None                                                           | Extreme agitation, irritability, pressured speech, pacing, anxiety                                                                                       | Not listed                            | Yes          | Depression                                                    | Uncle bipolar disorder                  | None                                                            | Discontinued St John's wort. Lithium 450mg twice day, clonazepam                                                                                                                |
| Nerenberg, Burt et al (1999) | F (51)             | St John's wort                           | 300 mg tds                  | Stressed and depressed        | A few days                      | None                                                           | Speech disorganized, giggling uncontrollably, hypermotoric, hypersexual.                                                                                 | Not listed                            | Yes          | Psychotic mania                                               | Unknown                                 | None                                                            | lithium 600mg bd                                                                                                                                                                |
| O'Breasail & Agouach (1998)  | M (76)             | St John's wort                           | Unknown                     | Depression                    | 6 weeks                         | Venlafaxine 37.5 mg tds                                        | Increased drive, overactive, pressured speech, irritability, euphoric grandiose plans. Reduced sleep and concentration                                   | Hypomania                             | Yes          | Depression                                                    | Depression & suicide                    | Cerebral vascular accident affecting right side. Atrial flutter | Valproate                                                                                                                                                                       |
| O'Breasail & Agouach (1998)  | M (28)             | St John's wort                           | Unknown                     | Posttraumatic stress symptoms | Approximately 3 months          | None                                                           | Flight of ideas, pressured speech, agitated, irritable, grandiose delusions                                                                              | Bipolar disorder, acute manic episode | Yes          | Posttraumatic stress symptoms                                 | Mother depression                       | Shoulder injury                                                 | Mood stabilization with lithium carbonate                                                                                                                                       |
| Raja & Azzoni (2006)         | F (47)             | Hypericum, 1bx paraguayens, cannab.      | Undetermined dosage         | Major depression              | 6 months                        | Previously paroxetine 20mg daily                               | Mixed state, unstable mood, crying, dysphoric, irritable, logorrhea, motor hyperactivity, distractibility, agitation, excessive sexual arousal, insomnia | Mixed state                           | Unclear      | Major depression                                              | Not listed                              | Not listed                                                      | Oxcarbazepine (up to 1200mg), clonazepam (up to 4mg) per day                                                                                                                    |
| Raja & Azzoni (2006)         | M (32)             | Hypericum                                | Dosage unknown              | Depression                    | 4 weeks                         | None                                                           | Sad, anxious, guilt, nervous, irritable, inconsistently hyperactive with racing thoughts, logorrhea, distractible, decreased sleep                       | Bipolar disorder, mixed state         | Yes          | Depression                                                    | Cousin schizoaffective, bipolar type    | Not listed                                                      | Full remission after 11 days, discharged on valproate                                                                                                                           |
| Schneck (1998)               | F (47)             | St John's wort                           | 0.1% tincture               | Depression                    | 10 days                         | Previously sertaline 50 mg daily                               | Racing and distorted thoughts, increased irritability, hostility, aggressive behavior, decreased sleep                                                   | Hypomania                             | Unclear      | Manic disorder and major depressive episode                   | Unknown                                 | Not listed                                                      | Discontinued St John's wort, complete resolution of symptoms in 2 days                                                                                                          |
| Spinella & Eaton (2002)      | F (42)             | Ginkgo biloba, melatonin, St John's wort | Unspecified doses           | Depression                    | Past several weeks              | Fluoxetine, buspirone                                          | Disrupted sleep-wake cycle, insomnia, racing thoughts, agitation, pressured speech.                                                                      | Hypomania                             | Unclear      | Depression and anxiety                                        | Unknown                                 | Cervical sprain, concussion                                     | Advised to cease all non-prescription medication, remained depressed                                                                                                            |
| Engelberg et al. (2001)      | M (26)             | Chinese red ginseng root                 | 250mg 2-3 caps per day      | Boost energy                  | 2 months                        | None                                                           | Pressured speech, racing thoughts, grandiosity, irritability. Thought form circumstantial, tangential, loose associations. poor insight                  | Manic symptoms                        | Yes          | None                                                          | None                                    | None                                                            | Ceased the supplement 14 hours prior to admission. Valproic acid 500mg bd, Lorazepam 1mg daily. Euthymic after 10 days                                                          |
| Gonzalez-Seijo et al (1995)  | F (35)             | Panax ginseng                            | "1 tablet" daily            | Unknown                       | 10 days                         | Previously lithium carbonate 1200mg, amitriptyline 75 mg daily | Euphoric, hyperactive, talkative, singing, spending and affective lability, irritable and aggressive. Little sleep                                       | Manic episode                         | Yes          | Depression with hospitalization                               | Unknown                                 | None                                                            | Haloperidol 7.5mg, lithium carbonate 1000 mg per day. Symptoms resolved in 48 hours                                                                                             |
| Norelli & Xu (2014)          | M (23)             | Asian red ginseng                        | Estimated 15g ginseng daily | Boost energy                  | 1 month                         | None                                                           | Increased psychomotor activity, pacing, pressured speech, racing disorganized thoughts, anxious, irritable, labile affect, auditory hallucinations       | Acute manic psychosis                 | Yes          | None                                                          | None                                    | None                                                            | Risperidone 1mg daily. Symptoms remitted after 3 days                                                                                                                           |
| Norelli & Xu (2014)          | M (79)             | Koreanginseng, yohimbine                 | Estimated 20g ginseng daily | Erectile dysfunction          | 2 months                        | Unknown                                                        | Motor restlessness, pressured speech, anxious mood, labile affect, racing disorganized thoughts, paranoid ideas                                          | Acute manic psychosis                 | Unclear      | Substance-induced hypomanic episode associated with yohimbine | Unknown                                 | Mild hypertension                                               | "a short course of antipsychotic treatment"                                                                                                                                     |
