# Supplementary material for: Mania Associated With Herbal Medicines, Other Than Cannabis: A Systematic Review and Quality Assessment of Case Reports
Source: PubMed Central journal article supplement (PMC6043668; doi:10.3389/fpsyt.2018.00280), 2018-07-06
Supplement: Table_2.pdf [file Table_2.pdf]

Table 2. The quality of individual case reports

| Publication                  | Case Report Quality Assessment Score | Validated instrument to assess causality | Botanical name of HM | Herbal Material assayed for authentication | HM composition detailed* | Brand name and manufacturer stated | HM dosage specified |
|------------------------------|--------------------------------------|------------------------------------------|----------------------|--------------------------------------------|--------------------------|------------------------------------|---------------------|
| Barbenel et al 2000          | 26 upper medium                      | No                                       | Yes                  | No                                         | No                       | No                                 | No                  |
| Dalwood et al 2015           | 23 upper medium                      | No                                       | Yes                  | No                                         | No                       | No                                 | No                  |
| Fahmi et al 2002             | 29 high                              | No                                       | Yes                  | No                                         | No                       | No                                 | Yes                 |
| Moses & Mallinger 2000       | 30 high                              | No                                       | Yes                  | No                                         | No                       | No                                 | Yes, Yes, No        |
| Nierenberg et al 1999        | 34 high                              | No                                       | Yes                  | No                                         | No                       | No                                 | Yes, Yes            |
| O'Breasail & Argouarch 1998  | 19 lower medium                      | No                                       | No                   | No                                         | No                       | No                                 | No, No              |
| Raja & Azzoni 2004           | 21 lower medium                      | No                                       | Yes                  | No                                         | No                       | No                                 | No, No              |
| Schneck 1998                 | 26 upper medium                      | No                                       | Yes                  | No                                         | No                       | No                                 | Yes                 |
| Spinella & Eaton 2002        | 27 upper medium                      | No                                       | Yes                  | No                                         | No                       | No                                 | No                  |
| Engelberg et al 2001         | 33 high                              | No                                       | Yes                  | No                                         | No                       | No                                 | Yes                 |
| Gonzalez-Seijo et al 1995    | 21 lower medium                      | No                                       | Yes                  | No                                         | No                       | No                                 | No                  |
| Norelli & Xu 2015            | 27 upper medium                      | No                                       | Yes                  | No                                         | No                       | No                                 | Yes, Yes            |
| Vazquez & Aguera-Ortiz 2012  | 27 upper medium                      | No                                       | Yes                  | No                                         | Yes                      | No                                 | Yes                 |
| Cotovio & Oliveira-Maia 2017 | 23 upper medium                      | No                                       | Yes                  | No                                         | No                       | No                                 | No                  |
| Hendrickson et al 2016       | 18 lower medium                      | No                                       | Yes                  | No                                         | No                       | No                                 | Yes, Yes, Yes       |
| Boerth & Caley 2003          | 21 low medium                        | Yes                                      | Yes                  | No                                         | No                       | No                                 | No                  |
| Capwell 1995                 | 30 high                              | No                                       | Yes                  | No                                         | No                       | No                                 | No                  |
| Emmanuel et al 1998          | 18 lower medium                      | No                                       | No                   | No                                         | No                       | No                                 | No                  |
| Guzel Ozdemir et al 2015     | 15 lower medium                      | No                                       | No                   | No                                         | No                       | Yes                                | Yes                 |
| Katz 2000                    | 30 high                              | No                                       | No                   | No                                         | No                       | Yes                                | Yes                 |
| Chong 2000                   | 26 upper medium                      | No                                       | No                   | Yes                                        | No                       | No                                 | No, No              |
| Partin & Pushkin 2004        | 23 upper medium                      | No                                       | Yes                  | No                                         | No                       | No                                 | Yes                 |
| Narasimha et al 2013         | 28 upper medium                      | No                                       | No                   | No                                         | No                       | Yes                                | Yes                 |
| Saatcioglu et al 2007        | 16 lower medium                      | No                                       | No                   | No                                         | Yes                      | No                                 | No                  |
| Kelly et al 2001             | 22 upper medium                      | No                                       | No                   | No                                         | No                       | No                                 | No                  |
| Khalid et al 2016            | 31 high                              | No                                       | Yes                  | No                                         | Yes                      | No                                 | Yes                 |

Note: \*detailed both plant part used and extract type
